# 1        **The DiaGame Study: Multimodal Data Collection in Free-Living** 2        **Conditions Using Consumer-Level Wearable Devices and Apps in** 3        **People with Diabetes**

4        Ryan de Vries<sup>1\*†</sup>, Edouard F.H. Reinders<sup>2,5\*</sup>, Danilo Ferreira de Carvalho<sup>3</sup>, Elma  
5        M.W.L. Cruys – Van de Meulengraaf<sup>2</sup>, Pieter M.E. van Gorp<sup>4</sup>, Pleun C.M. Wouters -  
6        van Poppel<sup>2</sup>, Uzay Kaymak<sup>3</sup>, Peter A.J. Hilbers<sup>1</sup>, Natal A.W. van Riel<sup>1‡</sup>, Harm R.  
7        Haak<sup>2,5‡</sup>

8        \* Shared first-author

9        ‡Equal contributions

10       †Corresponding author: [r.d.vries@tue.nl](mailto:r.d.vries@tue.nl)

11       <sup>1</sup>Department of Biomedical Engineering, Eindhoven University of Technology, Eindhoven, The Netherlands

12       <sup>2</sup>Máxima MC, Department of Internal Medicine, Eindhoven/Veldhoven, The Netherlands

13       <sup>3</sup>Jheronimus Academy of Data Science, Eindhoven University of Technology, 's-Hertogenbosch, The Netherlands

14       <sup>4</sup>Department of Industrial Engineering & Innovation Sciences, Eindhoven University of Technology, Eindhoven, The  
15       Netherlands

16       <sup>5</sup>Maastricht University, CAPHRI School for Public Health and Primary Care, Ageing and Long-Term Care, Maastricht, The  
17       Netherlands

## 18        **Abstract**

19        The everlasting interest in precision medicine has instigated a need for patient-specific  
20        multidimensional data collection. By leveraging consumer-level wearable devices and  
21        applications we can support this need by collecting multimodal data in uncontrolled free-  
22        living conditions. We used a continuous glucose monitor, a smartwatch with in-house  
23        developed application, and a smartphone application over a period of 14 days to collect data  
24        from 60 participants with diabetes. Data were collected on 77,683 CGM measurements,  
25        4,073 moods, 3,517 meals, 1,394 insulin injections, and 1,364 bouts of physical activity.  
26        Participants were able to effectively use the devices and applications, with 45 participants  
27        reporting data on all modalities and all participants reporting data on at least two modalities  
28        (in addition to the data collected from the smartwatch's internal sensors). These findings  
29        highlight the efficiency and effectiveness of consumer-level wearable devices to collect data  
30        from the comfort of the people's homes. Thereby, facilitating the need for a cost-effective  
31        and scalable approach for precision monitoring to the public.

32        **NOTE: This preprint reports new research that has not been certified by peer review and should not be used to guide clinical practice.**

## 33 **Introduction**

34 The emergence of precision or personalized medicine, which seeks to improve  
35 diagnosis, prediction, prevention, and treatment by focusing on the individual rather  
36 than on groups of people, has instigated a need for patient-specific multidimensional  
37 data to evaluate an individual's health, wellbeing, and environment. Diabetes  
38 mellitus, a chronic endocrine disease characterized by chronically elevated blood  
39 glucose levels, is one example of a disease for which precision medicine approaches  
40 can prove to be beneficial, due to the recognized heterogeneity in its etiology, clinical  
41 presentation, and pathogenesis<sup>1</sup>. The resulting need for patient-specific  
42 multidimensional data collection (precision monitoring) in people with diabetes has  
43 been highlighted in the latest American Diabetes Association (ADA) and European  
44 Association for the Study of Diabetes (EASD) consensus, along with recent  
45 publications, that advocated for precision monitoring methods as the next crucial  
46 step towards precision medicine for diabetes<sup>1,2</sup>. Precision medicine in the field of  
47 diabetes research focuses on elucidating pathophysiological processes (molecular  
48 and environmental), and consequently the heterogeneity in glycemic dynamics, that  
49 underly the disease. Although the primary cause of dysregulated glycemic dynamics  
50 concerns defects in at least one physiological pathway, multiple coherent factors  
51 including self-regulated behavior (e.g., dietary intake and physical activity) and  
52 health (e.g., medication and psychological status) also influence glycemic dynamics.  
53 Furthermore, lifestyle, defined by the long-term combination of these variables,  
54 impacts the risk for future complications<sup>3-7</sup>.

55 To capture glycemic variations, gain insight into the underlying glycemic effects of  
56 lifestyle, and ultimately monitor disease progression, all at an individual level, the  
57 availability of data is imperative. Although data measured in clinical and research

58 settings are well controlled, detailed data collection over weeks or months of time is  
59 unfeasible from these settings and difficult to scale to large cohorts. Consequently, a  
60 transition must be made towards data measured in the comfort of people's homes  
61 and throughout their daily lives. Furthermore, data from free-living conditions are  
62 representative of self-regulated behavior and habits, while measurements in  
63 controlled clinical settings are not, and these data offer the opportunity to capture the  
64 day-to-day glycemic variability typical for diabetes. The shift from clinical settings  
65 towards free-living conditions, to collect data for healthcare and research purposes,  
66 is enabled by the advent and enhancement of wearable devices. The continuous  
67 glucose monitor (CGM) has already provided tremendous insight into glycemic  
68 control for clinicians and people with diabetes<sup>8</sup>. Furthermore, smartphones and  
69 smartwatches have been shown to be promising for the monitoring of lifestyle  
70 variables (i.e., assessment of physical activity, diet, and psychological stress)<sup>9,10</sup>.

71 The use of wearable devices in diabetic populations for data collection in free-living  
72 conditions has, except for a few studies, been mostly limited to the effects on blood  
73 glucose levels of physical activity, diet, or psychological stress alone. The limited  
74 number of studies that simultaneously collected data on a broader range of variables  
75 associated with glycemic variability, have almost all been conducted with people with  
76 type 1 diabetes. Marling & Bunescu (2020) collected data in 12 participants with type  
77 1 diabetes for eight weeks on blood glucose levels (CGM), dietary intake, physical  
78 activity, usage of insulin analogues and other antidiabetic medication, and  
79 psychological status in free-living conditions<sup>11</sup>. Other studies such as the *D1NAMO*  
80 *project* (nine participants with type 1 diabetes, four-day study period) have collected  
81 data on electrocardiograms, breathing, accelerometers, CGMs, and annotated food  
82 pictures<sup>12</sup>. The *ShanghaiT1DM* & *ShanghaiT2DM* datasets (12 participants with type

83 1 diabetes and 100 participants with type 2 diabetes, study period up to 14 days)  
84 included dietary intake, insulin injections, and CGM data<sup>13</sup>. Nevertheless, while these  
85 studies collected multimodal data in free-living conditions in people with type 1  
86 diabetes, similar studies including people with type 2 diabetes are rare. Zahedani et  
87 al. (2023) used a CGM, a proprietary app for food logging, and heart rate data from a  
88 smartwatch to demonstrate that app-based lifestyle recommendations can improve  
89 eating habits, markers of glycemic variability, and weight in a predominantly healthy  
90 and prediabetic cohort (N = 1,066, including 94 subjects with non-insulin-treated type  
91 2 diabetes)<sup>14</sup>. Similarly, Pai et al. (2024) collected data from a CGM, app-based food  
92 logging, and accelerometer-derived step count to stratify postprandial peaks into  
93 normal and elevated categories and highlighted the relationship between post-meal  
94 steps and a reduced postprandial glucose response in Hispanic/Latino adults (N =  
95 36, including 14 subjects with non-insulin-treated type 2 diabetes)<sup>15</sup>.

96 Data collection in free-living conditions can be burdensome for the participants and  
97 researchers, especially when using analog data collection methods (i.e., paper  
98 logbooks and questionnaires). The data collection process often requires data  
99 digitization, structuring, and manual preprocessing. Some studies also relied on  
100 participants or experts to acquire information on dietary macronutrient composition.  
101 Dubosson, et al. (2018) used picture-based food annotation by a dietitian, while  
102 Marling & Bunescu (2020) relied on patient estimates to infer carbohydrate intake.

103 By integrating multiple wearable devices, and applications, some of the burdens of  
104 data collection in free-living conditions can be alleviated. The use of wearable  
105 devices negates the need for data inference and digitization. Moreover, the use of  
106 specifically consumer-level wearable devices, rather than research-dedicated  
107 devices, offers a cost-effective, scalable, and readily available method of collecting

108 data due to the widespread ownership of smartphones and the increasing popularity  
109 of smartwatches and fitness trackers. The consumer-level wearable devices, used in  
110 this study, included a CGM for continuous blood glucose measurements, a  
111 smartphone application to collect patient-reported dietary intake and physical activity,  
112 and a smartwatch to measure heart rate, acceleration, and step counts. The  
113 smartwatch is supplemented with an in-house developed application (publicly  
114 available) to allow participants to self-report mood and insulin usage. This application  
115 also incorporates a nudging mechanism, using vibrations and visual prompts on the  
116 screen, to encourage participants to report information as requested by the research  
117 team. The use of consumer-level wearable devices ultimately enables large-scale,  
118 patient-centered, and researcher-independent personalized data collection.

119 This article describes how commercially available consumer-level wearable devices  
120 and apps were used to collect data in free-living conditions in people with diabetes,  
121 predominantly type 2 diabetes. Subsequently, we assessed the feasibility of using  
122 wearable devices in this study population, which is typically older, and analyzed the  
123 effectiveness of our approach in terms of both the quantity and quality of the data  
124 collected. These data included measurements of blood glucose levels, detailed  
125 dietary intake, physical activity, insulin use, and mood over a 14-day period,  
126 supplemented with demographics and clinical measurements. Ultimately, we aim to  
127 showcase the ease and extent to which multimodal data can be collected in free-  
128 living conditions using consumer-level wearable devices and applications in a  
129 diabetic population (predominantly type 2).

130

## Results

131

### Participant Characteristics

132

Upon study completion, 59 participants (35 males and 24 females) were included

133

(excluding one dropout due to multiple CGM malfunctions). For one participant CGM

134

data of her own prescribed CGM was voluntarily provided due to device malfunction.

135

51 participants were diagnosed with type 2 diabetes and eight with type 1 diabetes,

136

with respective mean ages of 69.1 years (SD 7.1) and 54.6 years (SD 16.9), mean

137

BMI of 30.1 kg/m<sup>2</sup> (SD 4.9) and 25.4 kg/m<sup>2</sup> (SD 3.3), mean diabetes durations of

138

20.5 years (SD 7.3) and 26.6 years (SD 13.4), mean HbA1c's of 61.5 mmol/mol (SD

139

11.7) and 63.4 mmol/mol (SD 15.0), and mean time in ranges (3.9-10.0 mmol/L)

140

during the study of 66.8% (SD 22.7) and 62.7% (SD 21.6). For a complete overview

141

of participant characteristics (e.g., insulin and medications use, anthropometric

142

measurements, and fasting blood values), stratified by diabetes type, see Table 1.

143

### Data Quantity

144

The set of wearable devices provided a large extent of multimodal data (Fig. 1

145

showcases an example of four days of collected data). Data in Fig. 1 includes sensor

146

measurements of interstitial glucose concentrations and heart rate as well as self-

147

reported mood, insulin analogue injections, dietary intake (only carbohydrate content

148

is shown here), and physical activity. The data not only provided insight into the day-

149

to-day glucose variability at an individual level, but glycemic variations can also be

150

associated with reported self-regulated behavior. In this example, rises in blood

151

glucose levels were associated with high-carbohydrate meals and drops with

152

adequate preprandial insulin administration or periods of reported physical activity

153

with an elevated heart rate. In total, the dataset includes 77,683 CGM

154

measurements, 4,073 self-reported moods, 3,517 meals, 1,394 insulin injections,

155 and 1,364 bouts of physical activity. Excluding days of study visits, interstitial glucose  
156 levels were measured (every 15 minutes) in 97·5% of measurement instances. A  
157 daily energy intake of at least 1,000 kcal/day was reported on 80·6% of study days  
158 (excluding a single participant who was known to have started a crash-diet prior to  
159 study participation), while at least 1,000 steps a day were recorded on 93·0% of  
160 study days (excluding one wheelchair-bound participant). 96·6% of participants self-  
161 reported their mood, and 84·1% of insulin-dependent participants (n=44) reported  
162 insulin doses. 84·5% of participants had self-reported physical activity. 45  
163 participants (76·3%) managed to self-report data of every modality (including insulin  
164 doses when prescribed). Further analysis demonstrated participants were  
165 consistently engaged (i.e. they reported data) with the applications and smartwatch  
166 during the study period, only with a slight decrease in physical activity reporting after  
167 the second and third study days (Supplemental Fig. S3). The number of days  
168 participants reported data on each modality varied between participants (shown in  
169 Fig. 2). Excluding visit days, dietary intake had been reported for 11 to 13 days by all  
170 participants (67·8% with a daily energy intake greater than 1,000 kcal/day). The  
171 number of days with bouts of physical activity, which had a qualitatively similar  
172 distribution to the number of days with at least 3,000 steps, ranged from between  
173 nine and 13 days (total of 54·2%) to only one or no day (total of 27·1%). Mood was  
174 self-reported anywhere between zero (3·4%) and 13 (22·0%) days, with more than  
175 half (50·8%) of the participants reporting mood for at least ten days. 70·5% of  
176 insulin-dependent participants reported insulin usage for 11 to 13 days, while seven  
177 out of 44 (15·9%) of these participants (only one of these seven used rapid-acting  
178 insulin) did not report insulin usage at all.

179

## Data Quality

180 Evaluation of the quality of the patient-reported data suggested mixed results, as  
181 data was consistently reported but not always to the extent that it matched our  
182 expectations of a complete day of lifestyle events. A comparison of reported dietary  
183 intake and daily insulin doses to recommended guidelines and health records  
184 demonstrated discrepancies for a subset of participants. Firstly, the reported daily  
185 energy intake (shown in Fig. 3, with participants ordered by age), varied considerably  
186 between participants from 55·2 kcal/day to 4,766 kcal/day. The mean energy intake  
187 (excluding outliers below 1,000 kcal/day) was 1,796 kcal/day (SD 563 kcal/day) for  
188 men (dashed blue line) and 1,484 kcal/day (SD 356 kcal/day) for women (dashed  
189 green line). For reference, dietary reference values recommend 1,860 and 2,290  
190 kcal/day for, respectively, moderately active females and males between the ages of  
191 60 and 69 years<sup>16</sup>. Thus, the reported energy intake was lower than these reference  
192 values. A complete breakdown of macronutrient intake (carbohydrates, sugars,  
193 saturated and unsaturated fat, protein, fiber, and salt) is provided in Supplemental  
194 Fig. S4. Additionally, mean reported daily energy intake was not correlated with year  
195 of birth (Spearman's  $\rho = -0\cdot19$ ,  $p = 0\cdot15$ ).

196 Secondly, Bland-Altman plots comparing daily (accumulated) reported insulin doses  
197 with prescriptions from health records, stratified by rapid and (ultra) long-acting  
198 insulin analogues (Supplemental Fig. S5 and S6), showed an overall mixed  
199 agreement between reported and prescribed values. The median bias of respectively  
200 rapid- and long-acting analogue doses were both 0 IU/day. The relative difference  
201 between reported and prescribed daily dose was between -15% and 15% for 50·2%  
202 of study days for short-acting insulins (this range was defined to allow some daily  
203 variability, typical for short-acting insulin treatment). There was no difference



204 between reported and prescribed dose on 55.5% of study days for long-acting  
205 insulins. Otherwise, daily insulin doses were mostly underreported compared to  
206 prescribed doses (respectively 31.6% and 31.0%). Note for example the distinct  
207 declining line of points for long-acting insulins that correspond to days without  
208 reported doses. Nonetheless, the deviations in the reported daily doses could be  
209 attributed to a subset of individuals (Supplemental Fig. S7 and S8).

210 Ecological momentary assessment of mood with the nudging mechanism using the  
211 smartwatch provided a method to repeatedly gain insight into psychological status  
212 within the natural flow of life. Of the five mood categories, participants primarily  
213 reported being happy (13.5%) or relaxed (78.9%) throughout the day (Fig. 4), while  
214 stressed (5.4%), sad (1.2%), and angry (1.0%) were reported less frequently.  
215 Moreover, mood was reported most frequently shortly after participants were  
216 nudged, evident by a considerably higher number of reports during the hours of the  
217 day including 08:00, 12:00, 18:00, and 20:00. Differences in the number of reports at  
218 these four times can be attributed to differences in wearing percentage and response  
219 percentage. Firstly, the wearing percentage was lower at 52.7% (95% CI, 49.1% –  
220 56.3%) in the morning compared to 94.0% (95% CI, 92.1% – 95.6%), 95.6% (95%  
221 CI, 93.9% – 96.9%), and 96.1% (95% CI, 94.5% – 97.3%) at 12:00, 18:00, and  
222 20:00, respectively. Secondly, the nudging response percentage was considerably  
223 lower at noon with 33.0% (95% CI, 29.6% – 36.6%) compared to 18:00 and 20:00  
224 with respectively 41.5% (95% CI, 37.9% – 45.1%) and 42.1% (95% CI, 38.5% –  
225 45.7%), while the response percentage at 08:00 was 35.4% (95% CI, 30.7% –  
226 40.3%). Thus, the nudging mechanism was most effective in the evening times.  
227 These wearing and response percentages, overall and stratified by nudge time, did  
228 not decrease throughout the study period and were unaffected by the check-up call

229 around study day five (Supplemental Fig. S9 and S10). Nevertheless, similar to the  
230 reported dietary intake and insulin doses, the response percentages varied  
231 considerably among participants, ranging from 0% to 96% during the observational  
232 period (Supplemental Fig. S11). However, the percentages of responses to the  
233 nudging were not correlated with the number of moods reported outside of the  
234 nudging times (Spearman's  $\rho = -0.08$ ,  $p = 0.53$ ).

## 235 **Discussion**

236 By leveraging consumer-level wearable devices, supplemented with applications and  
237 a nudging mechanism, we aimed to efficiently collect multimodal personal data in  
238 free-living conditions on glycemic dynamics and an extensive set of associated  
239 variables (dietary intake, insulin administration, physical activity, and mood).  
240 Furthermore, the effectiveness and feasibility of using multiple wearable devices  
241 (CGM, smartphone, and smartwatch) with corresponding applications was assessed  
242 for data collection in a study population typical of type 2 diabetes (relatively old age  
243 and various comorbidities).

244 Our study showcased the opportunity to harness wearable devices as a feasible  
245 method of multimodal longitudinal data collection under free-living conditions in  
246 individuals. These devices required minimal calibration steps, could be operated by  
247 participants following a short instruction session, and no major problems were  
248 identified by the research team (except for two CGM sensor failures) or reported by  
249 participants. Moreover, the interaction of the participants with the applications was  
250 effective, reflected by the high percentage of participants providing self-reported  
251 information. Additionally, the use of a blinded CGM negated the need to scan every  
252 eight hours, potentially leading to loss of data and avoided influencing the  
253 participant's decision-making. The commercial availability of these consumer-level

254 devices and public access to the applications allows for time-effectiveness and easy  
255 scalability to large cohorts. These devices, thereby, provide the means to obtain  
256 continuous insight into lifestyle and personalized glycemc dynamics to the public  
257 and optionally their healthcare providers.

258 The combination of a CGM, a smartwatch, and a smartphone application provided  
259 insight into the daily life of an individual, from the comfort of their home, of which  
260 limited information was otherwise available. However, data collected under free-  
261 living conditions is usually not a comprehensive description of all lifestyle events.  
262 Evaluation of data quality indeed indicated that participant-reported data did not  
263 always compare to expectations, with heterogeneity in the magnitude of these  
264 differences between participants. Firstly, the energy intake reported through the  
265 smartphone application (Fig. 2) was, on average, lower than expected (around 450  
266 kcal/day lower) considering the European guidelines for moderately active women  
267 and men between the ages of 60 and 69 years<sup>16</sup>. Nonetheless, the mean reported  
268 energy intake was comparable to another study using the same smartphone  
269 application in a younger non-diabetic population (1,830 kcal/day, SD 485 kcal/day,  
270 n=100), which concluded that the application provided comparable results to 24-hour  
271 recalls. Dubosson et al., whom relied on picture-based food annotation by a dietitian,  
272 reported similar daily energy intakes (1,672 kcal/day, SD 1,038 kcal/day, n=8)<sup>12,17</sup>.  
273 Additionally, mean daily carbohydrate intake was similar to participant-reported  
274 values in people with type 1 diabetes<sup>11</sup>. Therefore, even though the energy intake  
275 may deliberately be reduced or underreported by participants during a study focused  
276 on lifestyle observation, partially accounting for the discrepancy, accurate dietary  
277 intake assessment in free-living conditions remains challenging. Nonetheless, all  
278 participants had reported dietary intake for at least 11 days. The participant's age did

279 not appear to be a limiting factor in reporting dietary intake using a smartphone  
280 application, even with a generally older cohort typical for type 2 diabetes.

281 Secondly, the smartwatch offered an easily accessible means for insulin usage  
282 registration, which needed no connection to the internet or a smartphone and was  
283 always at hand for participants. These reported insulin doses were accurate on a  
284 majority of the study days, when they could be compared to prescribed insulin  
285 treatments. These comparisons demonstrated that only five out of 36 long-acting  
286 insulin users, and no short-acting insulin users, failed to report at least one day for  
287 which the accumulated daily insulin dosages were comparable to their health  
288 records. However, the accumulated daily insulin dosages derived from insulin reports  
289 were frequently lower than prescribed (especially evident when one dose a day was  
290 prescribed, and none were reported). It is unclear why insulin administration was  
291 underreported. While daily dose adjustments are inherently part of the short-acting  
292 insulin treatment, the quality of reported data on insulin use may be affected by the  
293 otherwise repeated nature of daily insulin dosing leading to a lack of urgency to  
294 consistently report these events. It has already been shown that data on insulin  
295 dosing can be effectively collected from insulin pumps<sup>18</sup>, which are predominantly  
296 used by people with type 1 diabetes, whereas the recent development of smart  
297 insulin pens could potentially alleviate the burden of insulin dose registration  
298 altogether.

299 Thirdly, ecological momentary assessment of mood using the smartwatch,  
300 supplemented with a nudging mechanism four times a day, appeared to be an  
301 effective method to collect information on the perceived mood of participants.

302 Participant involvement was consistent throughout the study period with high  
303 wearing percentages (except in the early morning when several participants may not

304 yet have woken up) and overall steady response percentages. Participants for whom  
305 the nudging mechanism was less effective still provided ample mood reports without  
306 this nudging encouragement. In addition to providing a means to report mood and  
307 insulin doses, the smartwatch enabled the measurement of heart rate, acceleration,  
308 and step count to independently inform on physical activity (next to participant-  
309 reported physical activity). Lastly, the mean daily value of none of the variables  
310 reported by the participants decreased considerably throughout the study period;  
311 which, if this had happened, could have suggested that the data collection protocol  
312 may have placed too much of a burden on the participants. Thus, while the collected  
313 data may not be a complete description of all daily events, these wearable devices  
314 can effectively be used to acquire multimodal data in free-living conditions. Hereby  
315 answering the call for precision monitoring methods as the next step towards  
316 precision prevention, diagnostics, and prognostics <sup>1,2</sup>.

317 We acknowledge that the study cohort consisting of known patients does not provide  
318 a complete cross-sectional overview of the diabetic population in the Netherlands.  
319 Nonetheless, the study cohort is typical for a type 1 and 2 diabetes cohort, when  
320 compared to other studies in terms of patient characteristics. Inclusion may be  
321 biased for participants with at least some affinity for digital devices as those  
322 unfamiliar or hesitant to use wearable devices may be more likely to refuse  
323 participation. These latter people may need additional support to promote adequate  
324 use of these wearable devices.

325 Multiple enhancements could further enrich the collected data through the inclusion  
326 of standardized at-home meals and meal tolerance tests<sup>19</sup>. Furthermore, the  
327 registration of medication usage can be extended from the use of solely exogenous  
328 insulin to oral medications (e.g., metformin and GLP-1 agonists). Adherence to these

329 medications was currently assumed to be consistent throughout the study period,  
330 even though in practice adherence has shown to be inconsistent<sup>20</sup>. Additionally, real-  
331 time communication between devices can enable personalized nudging  
332 mechanisms, by incorporating information from all devices, for Just-In-Time Adaptive  
333 Interventions<sup>21</sup>. Tailoring the timing, frequency, and format of the nudging to the  
334 individual may improve effectiveness, while just-in-time nudging could be used to  
335 promote reports on dietary intake or insulin injections when blood glucose excursions  
336 are observed (currently the nudging mechanism was limited to data collection on  
337 mood due to the inherent continuity of human mood, which is lacking in all other  
338 variables).

339 The data collected in free-living conditions holds the potential for various clinical  
340 purposes, as indicated by the growing interest and recent increase in research within  
341 this field. Firstly, it offers a deeper understanding of intra-day and inter-day glycemic  
342 variability at an individual level. This understanding enables healthcare providers to  
343 deliver targeted and personalized care (precision medicine), which may contribute to  
344 improved health outcomes (e.g., to deliver app-based personalized lifestyle  
345 recommendations<sup>14</sup>). Secondly and more importantly, the collected data offers  
346 valuable insights when analyzed across broader groups. It can reveal inter-individual  
347 variations, facilitating the identification of distinct subgroups within the diabetes  
348 population, unveiling their distinct characteristics and needs (e.g., to stratify meal  
349 events for digital phenotyping<sup>15</sup>). Lastly, these data can support the development of  
350 next-generation simulators and digital twins, general or personalized dynamic  
351 metabolic models capable of predicting glucose levels and their modulation due to  
352 daily activities<sup>22</sup>. Such models have the potential to serve multiple purposes, from  
353 enhancing broader group-level education by showcasing the response of blood

354 glucose levels to lifestyle decisions to *in silico* experiments with virtual patient  
355 cohorts. A deeper understanding of a disease like diabetes and the various factors  
356 influencing blood glucose levels can foster increased self-confidence and effective  
357 self-management in people with diabetes. Given that improved self-management in  
358 diabetes correlates with better health and reduced short- and long-term  
359 complications, the significance of this understanding is clear<sup>23</sup>. Furthermore,  
360 diabetes self-management education and support (DSMES) currently occurs  
361 predominantly through one-on-one consultations with healthcare providers.  
362 However, with the escalating numbers of patients with diabetes globally, there is a  
363 growing need for more scalable, sustainable, and affordable support. Electronic  
364 resources and digital interventions, such as advanced simulators, predicting glucose  
365 levels at a personal level, could offer a crucial addition to future healthcare. They  
366 hold the potential to make healthcare more efficient and accessible while  
367 simultaneously improving its quality.

## 368 **Conclusion**

369 Our study showcased the feasibility and effectiveness of consumer-level wearable  
370 devices for multimodal data collection in free-living conditions, in a predominantly  
371 type 2 diabetes cohort. Moreover, the protocol can be scaled to larger cohorts and  
372 easily reproduced and integrated due to the commercial or free availability of the  
373 devices and applications. The multimodal data that can be measured in free-living  
374 conditions, by relying on wearable devices, applications, and the people themselves,  
375 give us the opportunity for precision monitoring to individualize patient care by  
376 accounting for intra- and inter-day heterogeneity in glycemic dynamics. Moreover,  
377 the data support further research into the effects of self-regulated behavior and  
378 health on glycemic dynamics and the long-term progression of the disease.

379 Ultimately, enabling us to provide patients with personalized approaches for diabetes  
380 treatment and self-management support.

## 381 **STAR Methods**

### 382 **Study Design and Participants**

383 Between June 2022 and June 2023, 60 participants (both type 1 and type 2  
384 diabetes) were included and data were collected over a consecutive 14-day period.  
385 All participants were recruited from the outpatient clinic of the Máxima Medical  
386 Centre (The Netherlands). Participants were eligible for inclusion when they met the  
387 following criteria: (I) diagnosis of type 2 diabetes or type 1 diabetes (body mass  
388 index (BMI) < 30 kg/m<sup>2</sup> for type 1 diabetes), (II) age > 18 years, (III) possession of a  
389 smartphone that runs the required application. Exclusion criteria comprised: (I)  
390 pregnancy or breastfeeding, (II) ongoing treatment for malignancy, (III) scheduled  
391 MRI scan during the study, and (IV) non-Dutch speaking. All individuals provided  
392 written informed consent. The study was registered in the Dutch Trial Registry  
393 (NL9290), approved by the Medical Research Ethics Committee Máxima MC (nr.  
394 L20.102), and conducted according to the principles of the Declaration of Helsinki.  
395 Participation consisted of two visits to the clinic and a telephone call. During the first  
396 visit, a brief overview of the participant's medical history was registered, along with  
397 medication use. Subsequently, blood pressure, resting heart rate, weight, and length  
398 were measured and a blinded CGM was applied. Finally, participants received a  
399 smartwatch with preinstalled study application, were instructed on how to download  
400 the smartphone application, and use the devices.  
401 Four to six days after the first visit participants were contacted by telephone to  
402 address specific issues, identified through a remote assessment of data reported on



403 dietary intake and physical activity. Instructions were reiterated if necessary.  
404 Subsequently, after 14 days, participants returned for the second visit in a fasted  
405 state to draw blood and return all devices. The data on these devices were  
406 subsequently pseudonymized and exported to a secure database.

#### 407 **Data Collection**

408 Glucose concentrations were measured using a *FreeStyle Libre Pro iQ* sensor  
409 (Abbott Diabetes Care, Illinois, USA), a blinded CGM that measured interstitial  
410 glucose levels every 15 minutes, 24 hours per day, for 14 consecutive days.  
411 Glycated hemoglobin (HbA1c), fasting glucose, and c-peptide concentrations were  
412 measured using the standard protocol of the hospital's clinical chemical laboratory.  
413 Participants received a *Samsung Galaxy Watch 2 Active 44mm* smartwatch during  
414 visit 1, pre-installed with the developed application (built for the Tizen mobile  
415 operating system). The application allowed participants to report mood and insulin  
416 analogue usage and automatically recorded measurements from the internal sensors  
417 (heart rate monitor, pedometer, triaxial accelerometer). First, (insulin-dependent)  
418 participants were instructed to self-report the type of insulin injected (short-acting,  
419 long-acting, or mixed insulin), dose, and time of injection through the dedicated  
420 screen. Secondly, participants were nudged four times a day at fixed times (8 AM, 12  
421 PM, 6 PM, 8 PM) through short vibrations and activation of the smartwatch  
422 showcasing the dedicated mood screen. The screen provided the option of five  
423 moods with matching emojis: happy, relaxed, stressed, angry, and sad. Participants  
424 were instructed to respond to these nudges and to report their mood when they  
425 perceived a change in their mood. Nonetheless, participants retained the autonomy

426 to report mood at any time via the application. An overview of the smartwatch  
427 application can be seen in Supplemental Fig. S1.

428 Dietary intake, both food and beverage consumption (excluding water, tea, and  
429 coffee without any additives), and physical activity were self-reported every day  
430 through the *Mijn Eetmeter* smartphone application (translates to 'My Eating Meter')  
431 on the participant's smartphone (Voedingscentrum, The Hague, The Netherlands)<sup>24</sup>.  
432 Reporting dietary intake required participants to enter the meal moment (breakfast,  
433 lunch, dinner, and snacks in between these meal moments), meal contents, and  
434 amounts of these meal contents. Options for meal contents are synchronized with  
435 the Dutch Food Composition Information Portal (NVIP) from the Dutch National  
436 Institute for Public Health and the Environment<sup>25</sup>. The application provides  
437 predefined portion sizes per product (e.g., one standard serving of a product or the  
438 distinction between a small, medium, or large portion with an indicated weight) next  
439 to the option to report the weight of the product. Instructions were given to report  
440 mealtimes in an adjacent text field that listed the different meal moments.

441 Furthermore, participants were instructed to report physical activity in the application.  
442 This action consisted of selecting the type of activity from a wide range of  
443 possibilities (from walking to cleaning the house), the duration of the activity, and  
444 noting the starting time in a text field. For an impression of the application, see  
445 Supplemental Fig. S2.

#### 446 **Data Security**

447 Participants were provided with preset study *Mijn Eetmeter* accounts to promote data  
448 security and privacy, aligning with the General Data Protection Regulation (GDPR).  
449 Additionally, the smartwatch and CGM operated offline during the study period.

## 450 **Statistical Analysis**

451 95% binomial proportion confidence intervals for wearing percentage (smartwatch  
452 was worn at the time of a nudge) and response percentage (responses to nudges  
453 when the smartwatch was determined to be worn) were calculated using Clopper-  
454 Pearson “exact” confidence intervals, unless stated otherwise. The wearing of the  
455 smartwatch was determined by the presence of a valid reading of the heart rate  
456 sensor within one minute of nudging, whereas the response percentage was defined  
457 as the percentage of responses to a nudge, within five minutes, when the  
458 smartwatch was worn according to the previous criterion.

459

## 460 **Acknowledgements**

461 This research is part of the DiaGame project funded by NWO Data2Person  
462 (628.011.027).

## 463 **Declaration of Interests**

464 H.H. was a shareholder and on the board of directors of HRH Diabetes Games B.V.  
465 at the time this work was conducted. All other authors declare no conflict of interest.

## 466 **Author Contributions**

467 R.V. was responsible for conceptualization, methodology, software, validation, formal  
468 analysis, investigation, resources, data curation, visualization, and writing the first  
469 draft of the manuscript. E.R. was responsible for conceptualization, methodology,  
470 validation, investigation, resources, and writing the first draft of the manuscript. D.C.  
471 worked on conceptualization, methodology, software, validation, investigation,  
472 resources, and data curation. E.C. was responsible for conceptualization,

473 methodology, validation, investigation, and resources. P.G., P.W., U.K, P.H, N.R.,  
474 and H.H. contributed to conceptualization, methodology, and reviewing of the  
475 manuscript. Additionally, N.R. and H.H. provided supervision and acquired funding,  
476 while N.R. was also responsible for project administration. All authors approved the  
477 definitive version of the manuscript.

## 478 **Data Availability Statement**

479 The data used and/or analyzed in the current study are available from the  
480 corresponding author upon reasonable request.

481

## 482 **References**

- 483 1. Chung, W. K. *et al.* Precision Medicine in Diabetes: A Consensus Report from  
484 the American Diabetes Association (ADA) and the European Association for  
485 the Study of Diabetes (EASD). *Diabetes Care* **43**, 1617–1635 (2020).
- 486 2. Hermanns, N. *et al.* Coordination of glucose monitoring, self-care behaviour  
487 and mental health: achieving precision monitoring in diabetes. *Diabetologia*  
488 vol. 65 1883–1894 Preprint at <https://doi.org/10.1007/s00125-022-05685-7>  
489 (2022).
- 490 3. American Diabetes Association. Pharmacologic approaches to glycemic  
491 treatment: Standards of medical care in diabetes-2021. *Diabetes Care* **44**,  
492 S111–S124 (2021).
- 493 4. Colberg, S. R. *et al.* Physical activity/exercise and diabetes: A position  
494 statement of the American Diabetes Association. *Diabetes Care* vol. 39 2065–  
495 2079 Preprint at <https://doi.org/10.2337/dc16-1728> (2016).

- 496 5. Evert, A. B. *et al.* Nutrition therapy for adults with diabetes or prediabetes: A  
497 consensus report. *Diabetes Care* vol. 42 731–754 Preprint at  
498 <https://doi.org/10.2337/dci19-0014> (2019).
- 499 6. O’Hearn, M. *et al.* Incident type 2 diabetes attributable to suboptimal diet in  
500 184 countries. *Nat Med* **29**, 982–995 (2023).
- 501 7. Young-Hyman, D. *et al.* Psychosocial care for people with diabetes: A position  
502 statement of the American diabetes association. *Diabetes Care* vol. 39 2126–  
503 2140 Preprint at <https://doi.org/10.2337/dc16-2053> (2016).
- 504 8. Miller, E. M. Using continuous glucose monitoring in clinical practice. *Clinical*  
505 *Diabetes* vol. 38 429–438 Preprint at <https://doi.org/10.2337/cd20-0043> (2020).
- 506 9. Pendergast, F. J., Ridgers, N. D., Worsley, A. & McNaughton, S. A. Evaluation  
507 of a smartphone food diary application using objectively measured energy  
508 expenditure. *International Journal of Behavioral Nutrition and Physical Activity*  
509 **14**, 1–10 (2017).
- 510 10. Rodriguez-León, C., Villalonga, C., Muñoz-Torres, M., Ruiz, J. R. & Banos, O.  
511 Mobile and wearable technology for the monitoring of diabetes-related  
512 parameters: Systematic review. *JMIR mHealth and uHealth* vol. 9 Preprint at  
513 <https://doi.org/10.2196/25138> (2021).
- 514 11. Marling, C. & Bunescu, R. The OhioT1DM Dataset for Blood Glucose Level  
515 Prediction: Update 2020. in *CEUR Workshop Proceedings* 71–74 (2020).
- 516 12. Dubosson, F. *et al.* The open D1NAMO dataset: A multi-modal dataset for  
517 research on non-invasive type 1 diabetes management. *Inform Med Unlocked*  
518 **13**, 92–100 (2018).

- 519 13. Zhao, Q. *et al.* Chinese diabetes datasets for data-driven machine learning.  
520 *Sci Data* **10**, (2023).
- 521 14. Zahedani, A. D. *et al.* Digital health application integrating wearable data and  
522 behavioral patterns improves metabolic health. *NPJ Digit Med* **6**, (2023).
- 523 15. Pai, A. *et al.* Multimodal digital phenotyping of diet, physical activity, and  
524 glycemia in Hispanic/Latino adults with or at risk of type 2 diabetes. *NPJ Digit*  
525 *Med* **7**, (2024).
- 526 16. EFSA (European Food Safety Authority). Dietary Reference Values for  
527 nutrients. Summary report. *EFSA Supporting Publications* **14**, (2017).
- 528 17. Ocké, M., Dinnissen, C., Stafleu, A., de Vries, J. & van Rossum, C. Relative  
529 validity of MijnEetmeter: A food diary app for self-monitoring of dietary intake.  
530 *Nutrients* **13**, (2021).
- 531 18. Prioleau, T., Bartolome, A., Comi, R. & Stanger, C. DiaTrend: A dataset from  
532 advanced diabetes technology to enable development of novel analytic  
533 solutions. *Sci Data* **10**, (2023).
- 534 19. Héritier, H. *et al.* Food & You: A digital cohort on personalized nutrition. *PLOS*  
535 *Digital Health* **2**, (2023).
- 536 20. Kirkman, M. S. *et al.* Determinants of adherence to diabetes medications:  
537 Findings from a large pharmacy claims database. *Diabetes Care* **38**, 604–609  
538 (2015).
- 539 21. Spruijt-Metz, D. *et al.* Innovations in the Use of Interactive Technology to  
540 Support Weight Management. *Current Obesity Reports* vol. 4 510–519  
541 Preprint at <https://doi.org/10.1007/s13679-015-0183-6> (2015).

- 542 22. Katsoulakis, E. *et al.* Digital twins for health: a scoping review. *npj Digital*  
543 *Medicine* vol. 7 Preprint at <https://doi.org/10.1038/s41746-024-01073-0> (2024).
- 544 23. Davis, J. *et al.* 2022 National Standards for Diabetes Self-Management  
545 Education and Support. *Diabetes Care* **45**, 484–494 (2022).
- 546 24. Voedingscentrum. Mijn Eetmeter. <https://mijn.voedingscentrum.nl/nl/eetmeter/>  
547 (2023).
- 548 25. Dutch National Institute for Public Health and the Environment. Nederlandse  
549 Voedingsmiddelen Informatie Portaal. [https://www.rivm.nl/nederlands-](https://www.rivm.nl/nederlands-voedingsstoffenbestand/organisatie/nederlands-voedingsmiddeleninformatieportaal)  
550 [voedingsstoffenbestand/organisatie/nederlands-](https://www.rivm.nl/nederlands-voedingsstoffenbestand/organisatie/nederlands-voedingsmiddeleninformatieportaal)  
551 [voedingsmiddeleninformatieportaal](https://www.rivm.nl/nederlands-voedingsstoffenbestand/organisatie/nederlands-voedingsmiddeleninformatieportaal) (2024).
- 552
- 553

| Demographics                                   | Mean ± Standard Deviation   |                            |
|------------------------------------------------|-----------------------------|----------------------------|
|                                                | Type 2 Diabetes<br>(n = 51) | Type 1 Diabetes<br>(n = 8) |
| General                                        |                             |                            |
| Male                                           | 32                          | 3                          |
| Female                                         | 19                          | 5                          |
| BMI (kg/m <sup>2</sup> )                       | 30.1 ± 4.9                  | 25.4 ± 3.3                 |
| Age (years)                                    | 69.1 ± 7.1                  | 54.6 ± 16.9                |
| HbA1c (mmol/mol)                               | 61.5 ± 11.7                 | 63.4 ± 15.0                |
| HbA1c (%)                                      | 7.8 ± 1.1                   | 8.0 ± 1.4                  |
| Systolic Blood Pressure (mmHg)                 | 133 ± 16                    | 128 ± 13                   |
| Diastolic Blood Pressure (mmHg)                | 73 ± 8                      | 76 ± 4                     |
| Resting Heart rate (bpm)                       | 75 ± 17                     | 81 ± 12                    |
| Diabetes Duration (years)                      | 20.5 ± 7.3                  | 26.6 ± 13.4                |
| Fasting Glucose (mmol/L)                       | 7.8 ± 2.5*                  | 10.7 ± 4.0                 |
| Fasting C-Peptide (nmol/L)                     | 0.69 ± 0.44*<br>(1 BLOQ)    | 0.10 ± 0.14<br>(5 BLOQ)    |
| Time in Range During the Study (%)             | 66.8 ± 22.7                 | 62.7 ± 21.6                |
| Daily Insulin per kg bodyweight<br>(IU/kg/day) | 0.45 ± 0.45                 | 0.44 ± 0.20                |
| Insulin Analogues and Medication               |                             |                            |
| Insulin Aspart                                 | 17                          | 7                          |
| Insulin Lispro                                 | 2                           | 1                          |
| NPH Insulin                                    | 2                           | 1                          |
| Insulin Glargine                               | 9                           | 0                          |
| Insulin Detemir                                | 2                           | 0                          |
| Insulin Degludec                               | 25                          | 5                          |
| Mixed Insulins                                 | 1                           | 0                          |
| Insulin Pump Therapy                           | 1                           | 2                          |
| Metformin                                      | 41                          | 1                          |
| SGLT2 Inhibitors                               | 17                          | 0                          |
| GLP-1 Agonist                                  | 23                          | 0                          |
| Sulfonylureum Derivatives                      | 25                          | 0                          |

554  
555

**Table 1: Participant characteristics stratified by diabetes type.** \*n=58 as one participant had not fasted the morning of visit 2. BLOQ: Below Limit of Quantification (0.03 nmol/L for C-peptide); these



556 *values were imputed with half of the detection limit concentration to calculate the corresponding*  
557 *presented statistic. Time in range is defined by the percentage of times CGM values were in between*  
558 *3.9 and 10.0 mmol/L.*

559

560

561

562

563

564

565

566

567

568

569

570

571

572

## Figures

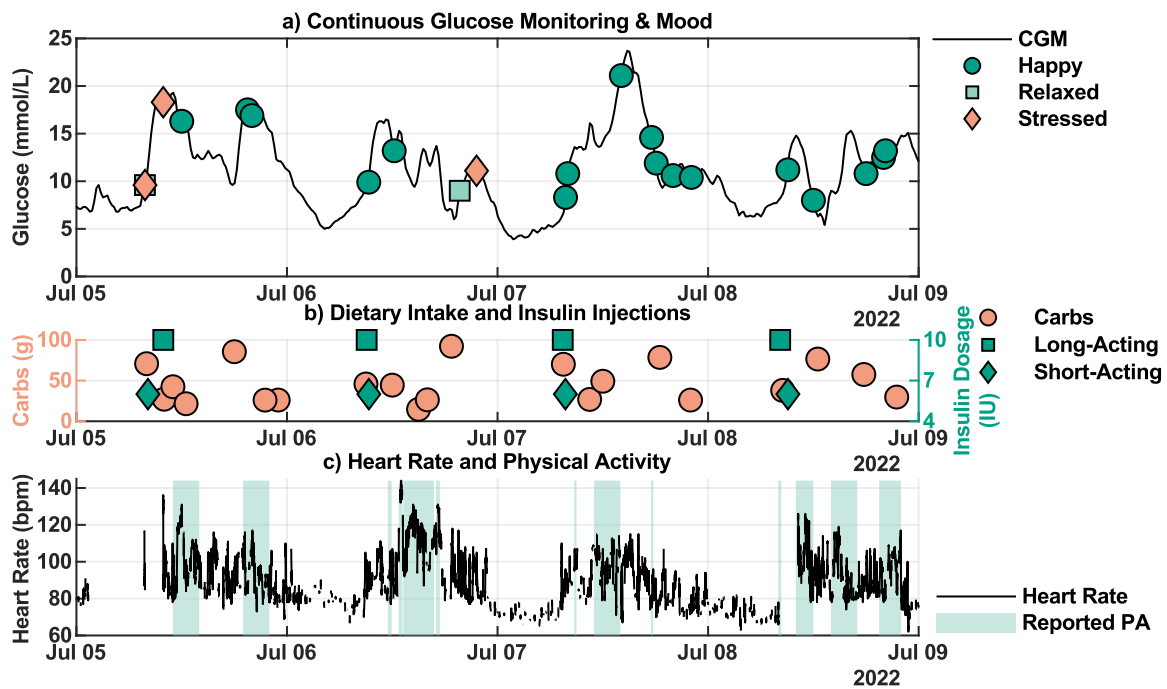

573

574 **Figure 1: Example of four days of data collected from one participant.**

575 *Panel A: CGM measurements (in mmol/L, solid black line) and reported moods (dark green circle =*  
576 *happy, light green square = relaxed, light red diamond = stressed; sad and angry were not reported*  
577 *by this participant in this interval). Panel B: Carbohydrate content (in grams) of reported dietary intake*  
578 *(light red circles) and reported short-acting (dark green diamonds) and long-acting (dark green circles)*  
579 *insulin doses (IU). Panel C: Measured heart rate in beats per minute (solid black line) and participant-*  
580 *reported bouts of physical activity (light green shade). Accelerometer and pedometer data were*  
581 *excluded from this figure for clarity.*

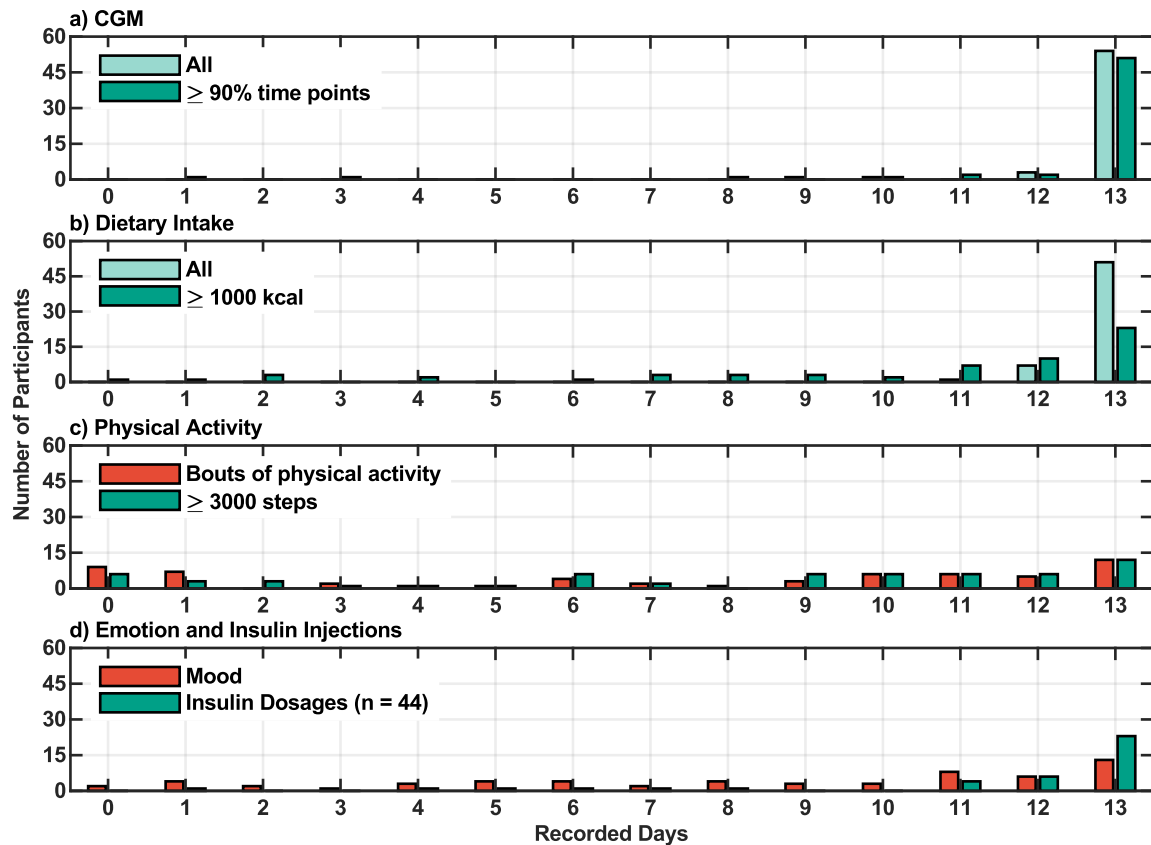

582

583 **Figure 2: Distribution of available days of collected data per participant for various data**  
 584 **modalities.**

585 *Distribution of the total number of days, excluding days of study visits, with collected data per*  
 586 *participant for each of the data modalities. Panel A: Distributions of available CGM measurements*  
 587 *(including all days = light green, including days with at least 90% of CGM time points = dark green).*  
 588 *Panel B: Distributions of self-reported dietary intake (including all days = light green, including days*  
 589 *with at least 1,000 kcal reported = dark green). Panel C: Distributions of self-reported physical activity*  
 590 *(red) and days with at least 3,000 steps (green). Panel D: Distributions of self-reported mood (red)*  
 591 *and insulin injection doses (green, n = 44 since not all study participants were insulin dependent).*

592

593

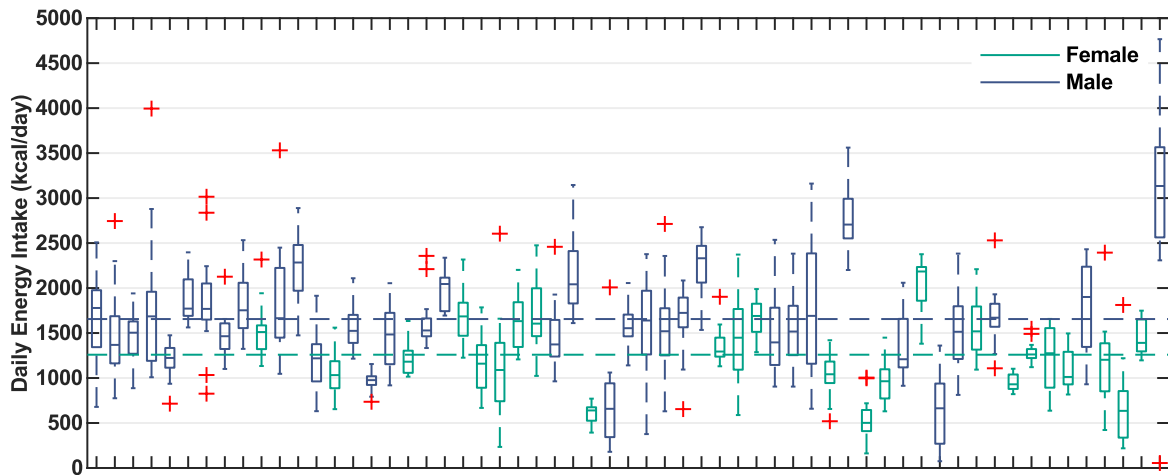

594

595 **Figure 3: Reported daily energy intake colored by sex and sorted by year of birth (ascending**  
596 **from left to right).**

597 *Boxplots of the daily energy intake (kcal/day) reported from day two (day one excluded due to the*  
598 *variability of the times of day at inclusion) until visit 2 for each participant. Participants are colored by*  
599 *sex (blue = male, green = female, outliers are colored red) and sorted by year of birth (ascending from*  
600 *left to right). Mean daily energy intake per sex (including outliers) is depicted by corresponding*  
601 *dashed lines (1,655 kcal/day for males and 1,259 kcal/day for females).*

602

603

604

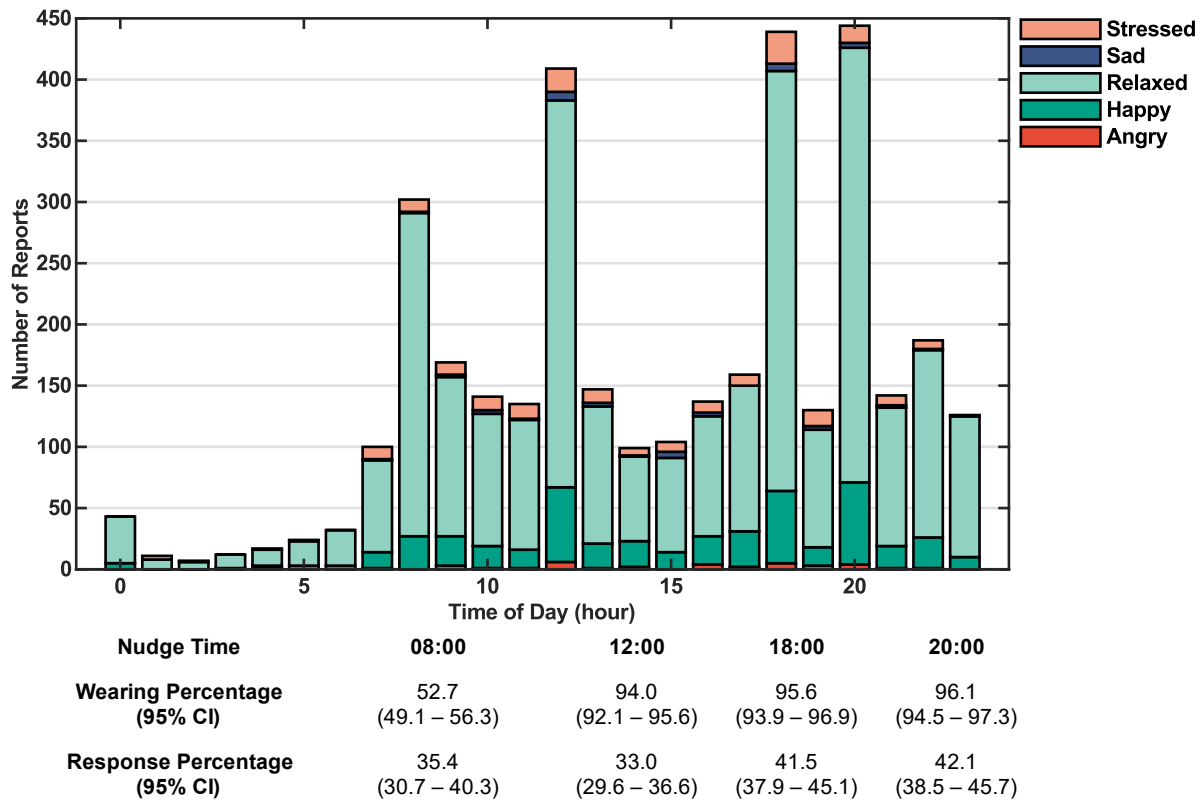

605

606 **Figure 4: Moods reported by participants at each time of day and nudging statistics at each**  
 607 **nudging instance.**

608 *Number of moods reported at each hour of the day (angry = dark red, happy = dark green, relaxed =*  
 609 *light green, sad = dark blue, stressed = light red). Underneath the figure, the wearing percentage at*  
 610 *each nudge time (08:00, 12:00, 18:00, and 20:00) and corresponding response percentage to the*  
 611 *nudges are given with 95% confidence intervals.*

612

613

614

615

616

617

618

619
